# Supplementary material
Source: Springer Nature journal article supplement (https://www.springermedizin.de/resource/supplementary/13002_2011_279_MOESM5_ESM.pdf/9627512)

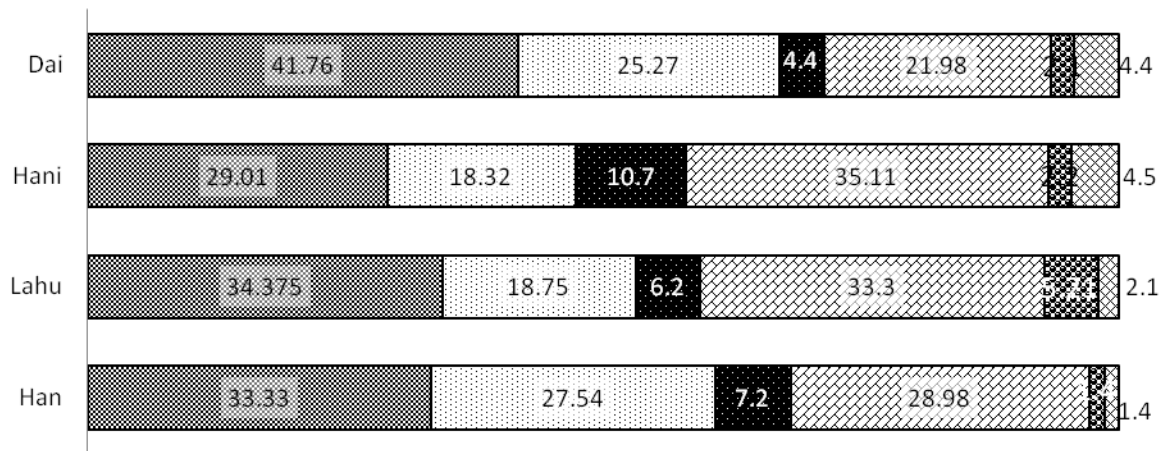

Leafy vegetable
  Other vegetable
  Spice

Fruit
  Starch-tuber
  Nut

Supplement: MOESM5 [file 9627512]
